# Supplementary material for: Identification and validation of potential reference gene for effective dsRNA knockdown analysis in Chilo partellus
Source: PubMed Central journal article supplement (PMC6754392; doi:10.1038/s41598-019-49810-w), 2019-09-20
Supplement: 41598_2019_49810_MOESM1_ESM.pdf [file 41598_2019_49810_MOESM1_ESM.pdf]

**Identification and validation of potential reference gene for effective dsRNA knockdown analysis in *Chilo partellus***

Authors: Olawale Samuel Adeyinka <sup>1</sup>, Bushra Tabassum\*<sup>1</sup>, Idrees Ahmad Nasir<sup>1</sup>, Iqra Yousaf<sup>1</sup>, Imtiaz Ahmad Sajid<sup>1</sup> Khurram Shehzad<sup>2</sup>, Anicet Batcho<sup>1</sup> and Tayyab Husnain<sup>1</sup>.

**Figure S1.** Standard curves of the 7 candidate reference genes

**Figure S2.** Stability ranking of seven candidate reference gene expressions under two different treatments of feeding assay; with crude extracts of bacterially-expressed dsRNA, and Purified

**Supplementary 3.** List of reference gene with assigned accession number from NCBI GenBank submitted sequences

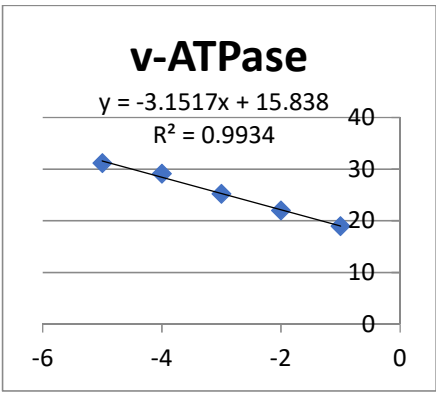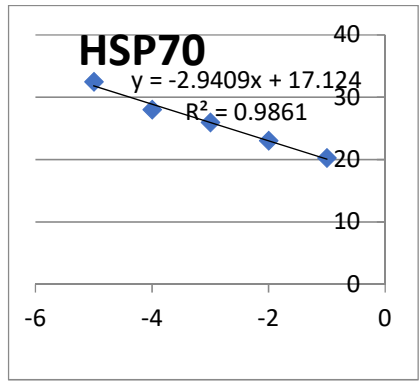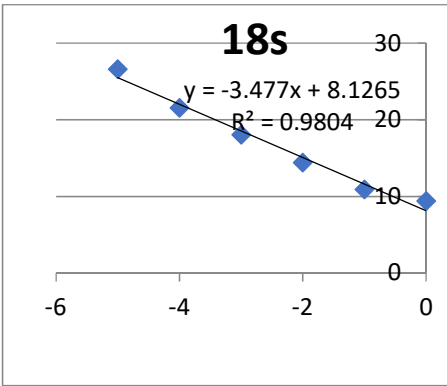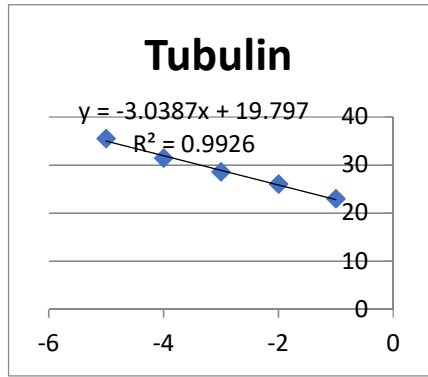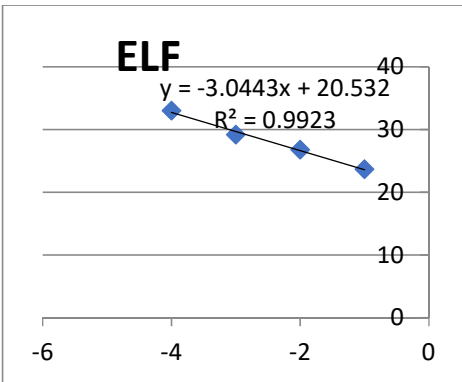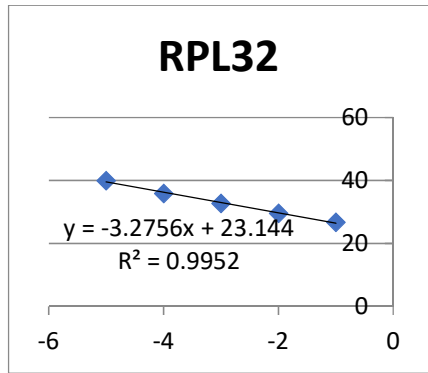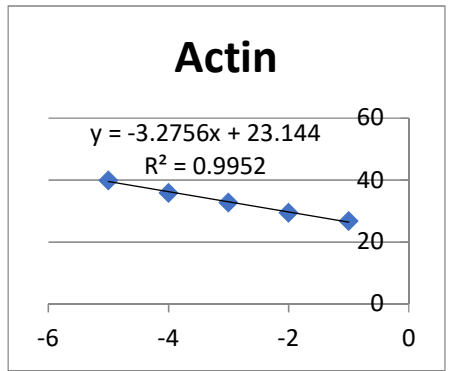

Figure S1. Standard curves of the 7 candidate reference genes

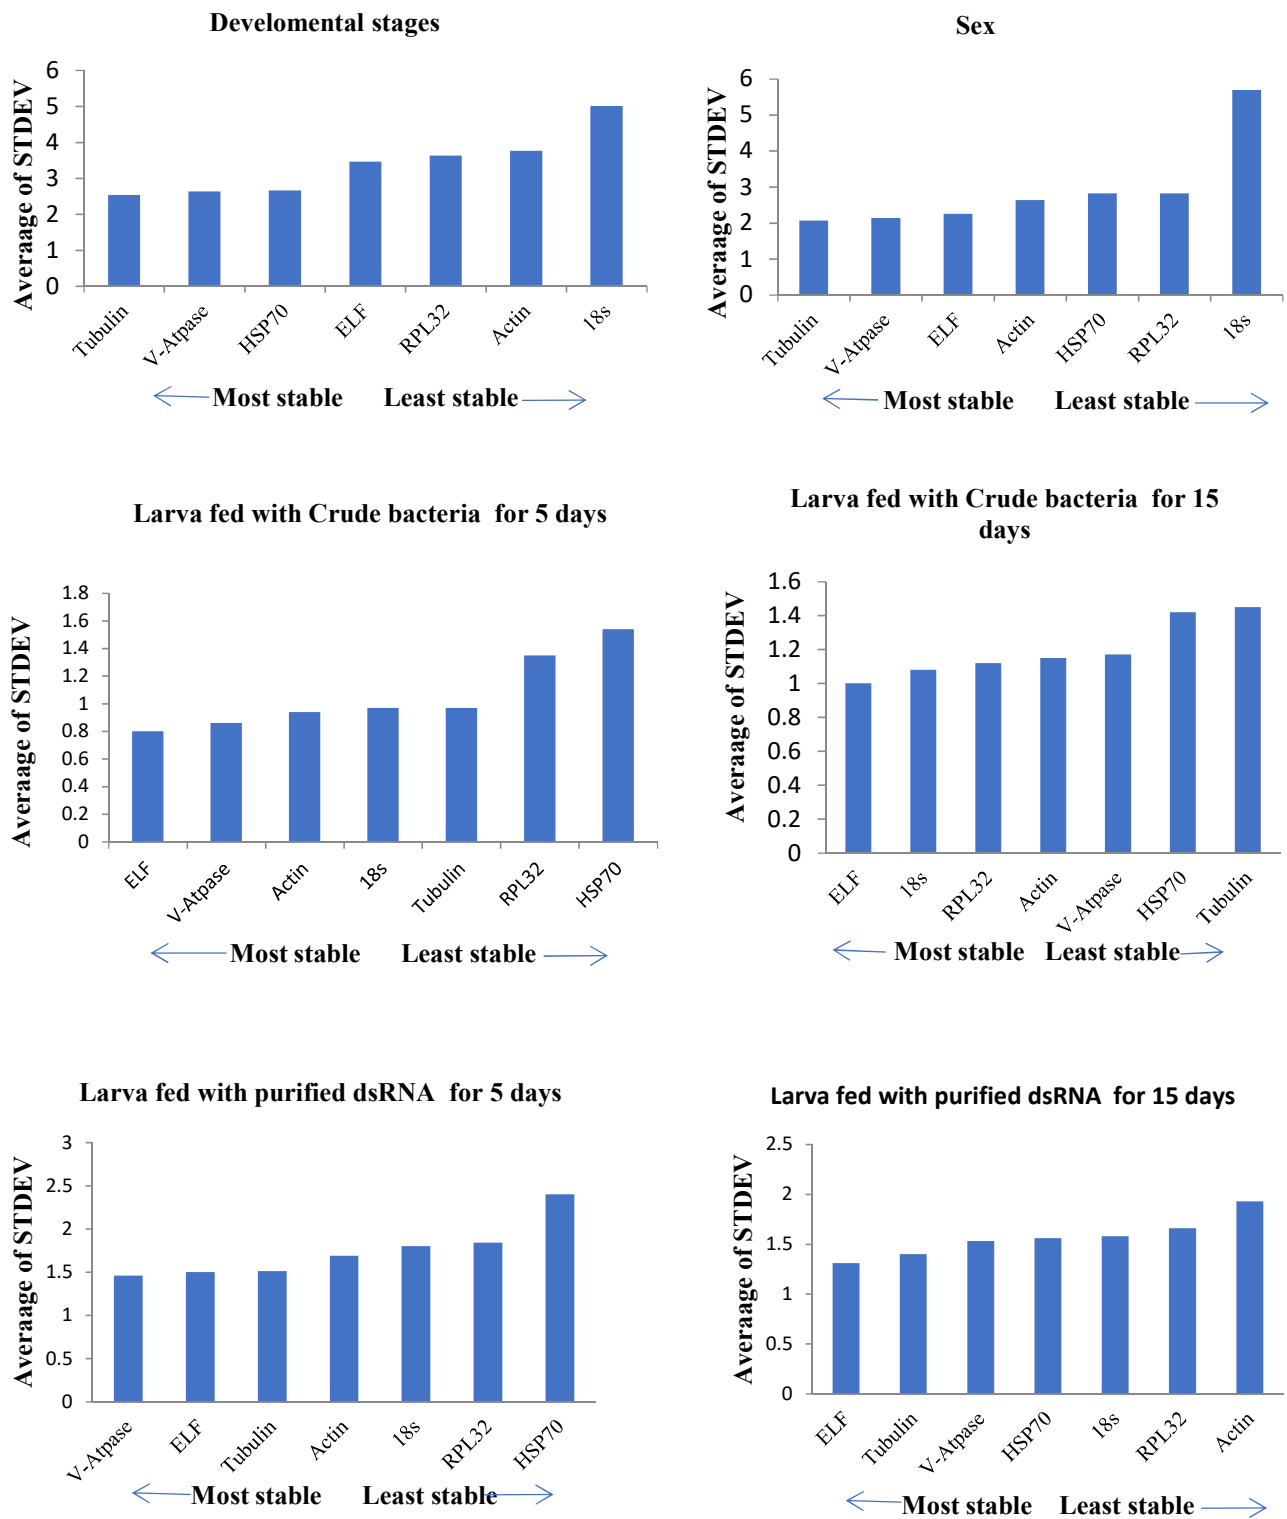

**Figure S2:** Stability ranking of seven candidate reference gene expressions under two different treatments of feeding assay; with crude extracts of bacterially-expressed dsRNA, and Purified dsRNA, generated by Delta CT method. Panels were represented as the stability validation results of reference genes expression in developmental stages, sex, feeding assay of 5 and 15 days on crude extracts of bacterially expressed dsRNA and purified dsRNA fractions.

**Supplementary 3: List of reference gene with assigned accession number from NCBI GenBank submitted sequences**

1. >MH430673 [Organism=Chilo partellus] ribosomal protein L32 (RpL32) mRNA, short sequence

CGCCCTAATTACGTCTAAAGAGGAGAAGATTTATCCGCCATCAGTCAGATCGCTATG  
ACAAACTTAAGCGTAACTGGCGCAACCGAGAGGTATTGACAACAGAGTA

2. >MH430674 [Organism=Chilo partellus] beta-tubulin mRNA, short sequence

CGGGAGGGAAAATGAAAGTCGTCATAGTTTCGTCTGTGTTCTCTAGAGTCTCGGTGG  
ATGACAGGAAGAGAAAAGGTTCTACGACAAAAAC

3. >MH430675 [Organism=Chilo partellus] V-type ATP synthase catalytic subunit, short sequence

GCATGTTGGATGTGTGTCCACGACTCATCTTCTTCATGATGGATCCGGACGCCGTCG  
AAAACCACCGACAGTTCTGGGAAAGTTTTTTGTCAAACATCTCGTTACCACGAGA

4. >MH430676 [Organism=Chilo partellus] 18S ribosomal RNA gene, short sequence

ATCAAAGATCAGGGGGCTTCGTATGCGACGTTAGAGGTGTACTTCTTGGATCGTCGC  
AGACGAAATCAGCGAAAGCATTGAGAAA

5. >MH430677 [Organism=Chilo partellus] heat shock protein 70 (hsp70) mRNA, short sequence

ATAACCTGCTGCTGCTGCGATTGCTTACGGTGTGGACTAGCAGTCAGGTAGTGGAGT  
ACGAATGTCCTGCATTTTCGATCTCGGTGGTGGCATTGATGTAGAAAAAAAAAAC

6. >MH430678 [Organism=Chilo partellus] elongation factor 1 alpha mRNA, short sequence

GAACCCCATACAGCGAATCCCGATTTGAAGAAATCAAAAAGGAAGTCTCCTCATA  
CATTAAGAAAATCGGTTATAACCCAGCTGCTGTCGCTTTCGTACCTATTTCTGGTTGG  
CATGGAGACAACATG

7. >MH430679 [Organism=Chilo partellus] actin mRNA, short sequence

AAAAGAGCAAGGTCGGTGTTCCTTCTGCTCCTGTCGGCGATACCGGGGTACATGGTG  
GTGCAATGGACATGACGGTGTGGCGTACAGGTCCTTACGGATGTCAACACGTCTGG  
GGGTGGAAA
